# Supplementary material for: Thermoresponsive structured emulsions based on the fibrillar self-assembly of natural saponin glycyrrhizic acid
Source: Royal Society of Chemistry journal article supplement (doi:10.1039/c6fo01485b), 2016-11-21

## Supplementary Information

### **Thermoresponsive structured emulsions based on fibrillar self-assembly of natural saponin glycyrrhizic acid**

Zhili Wan,<sup>1</sup> Yingen Sun,<sup>1</sup> Lulu Ma,<sup>1</sup> Jian Guo,<sup>1</sup> Jinmei Wang,<sup>1</sup> Shouwei Yin,<sup>1</sup> and Xiaoquan Yang<sup>\*,1,2</sup>

<sup>1</sup> Research and Development Center of Food Proteins, Department of Food Science and Technology, South China University of Technology, Guangzhou 510640, China

<sup>2</sup> Guangdong Province Key Laboratory for Green Processing of Natural Products and Product Safety, South China University of Technology, Guangzhou 510640, China

#### AUTHOR INFORMATION

Xiaoquan Yang (\*corresponding author)

E-mail: [fexqyang@163.com](mailto:fexqyang@163.com); [fexqyang@scut.edu.cn](mailto:fexqyang@scut.edu.cn)

Fax: (086) 20-87114263; Tel: (086) 20-87114262

Fig. S1 (A) Interfacial tension as a function of time (30 min) for the GA solutions (0, 0.025, 0.05, and 0.1 wt%) at the oil-water interface. (B) Lissajous plots of surface pressure versus deformation obtained during amplitude sweep (10%) of the oil-water interface stabilized by 0.1 wt% GA fibril solution.

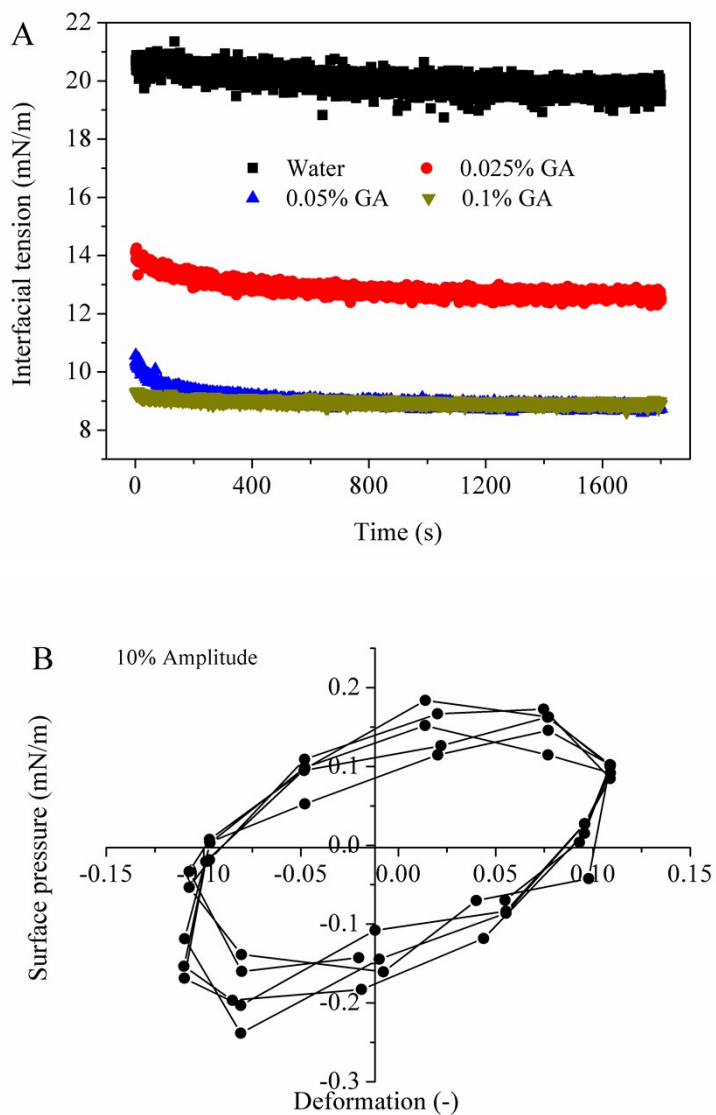

Fig. S2 (A) Photographs (above) of GA solutions (0.1-4 wt%) after storage at room temperature (25 °C) for 12 h, and a transparent hydrogel is formed at the low GA fibril concentration of 0.5 wt% (marked by red arrows); AFM (below) height image with corresponding AFM peak force error image of a thin layer of the 1 wt % GA hydrogel. (B) Amplitude and (C) frequency sweeps for the hydrogels prepared at different GA fibril concentrations (1, 2, and 4 wt%).  $G'$  and  $G''$  are shown as filled and open symbols, respectively.

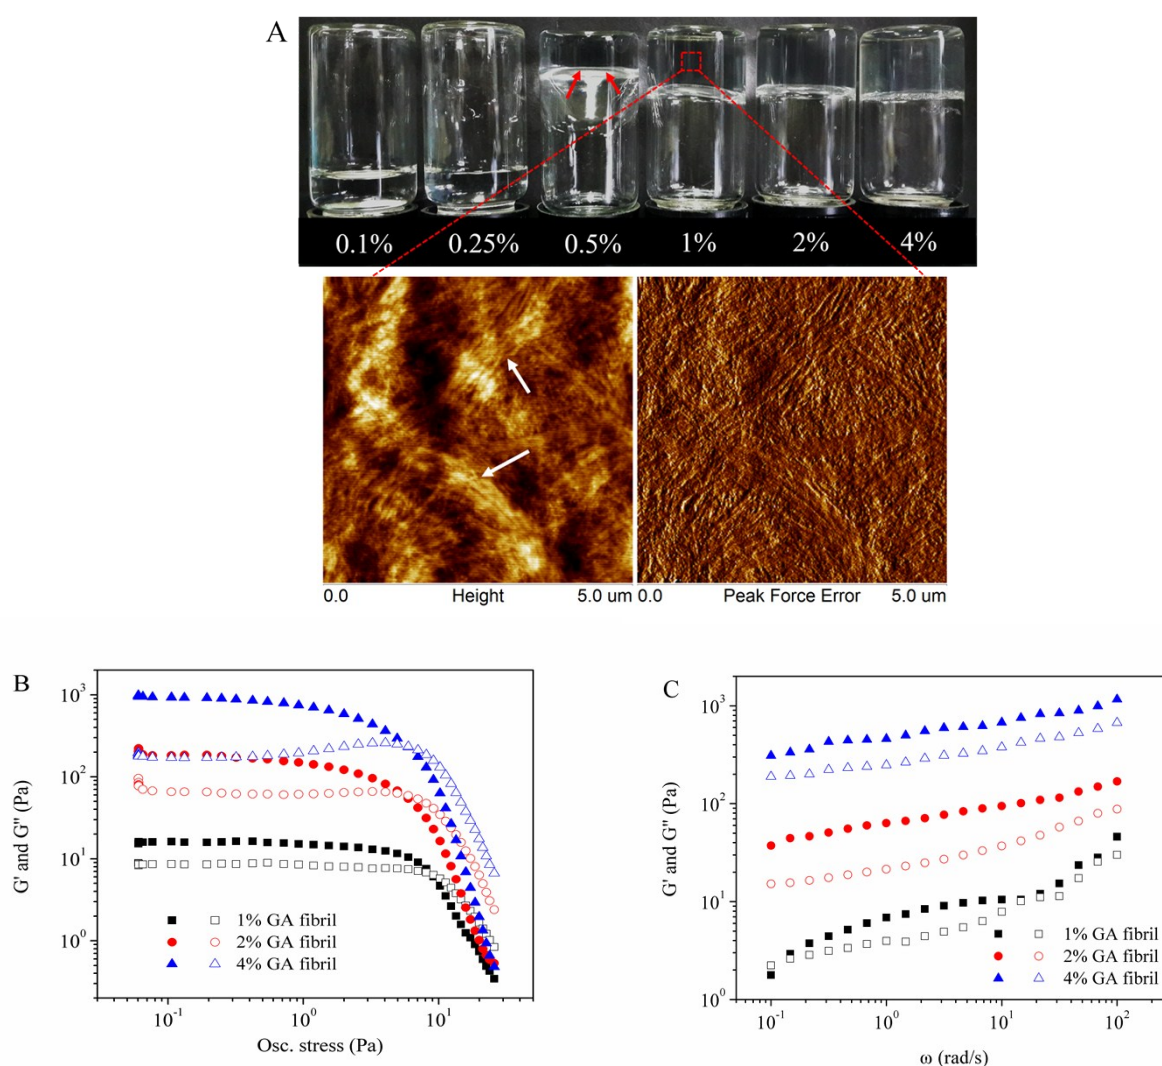

Fig. S3 Spread-like appearance and optical microscopy image (scale bar = 30  $\mu\text{m}$ ) of the emulsion gel (60 wt% olive oil) stabilized by 4 wt% GA fibril.

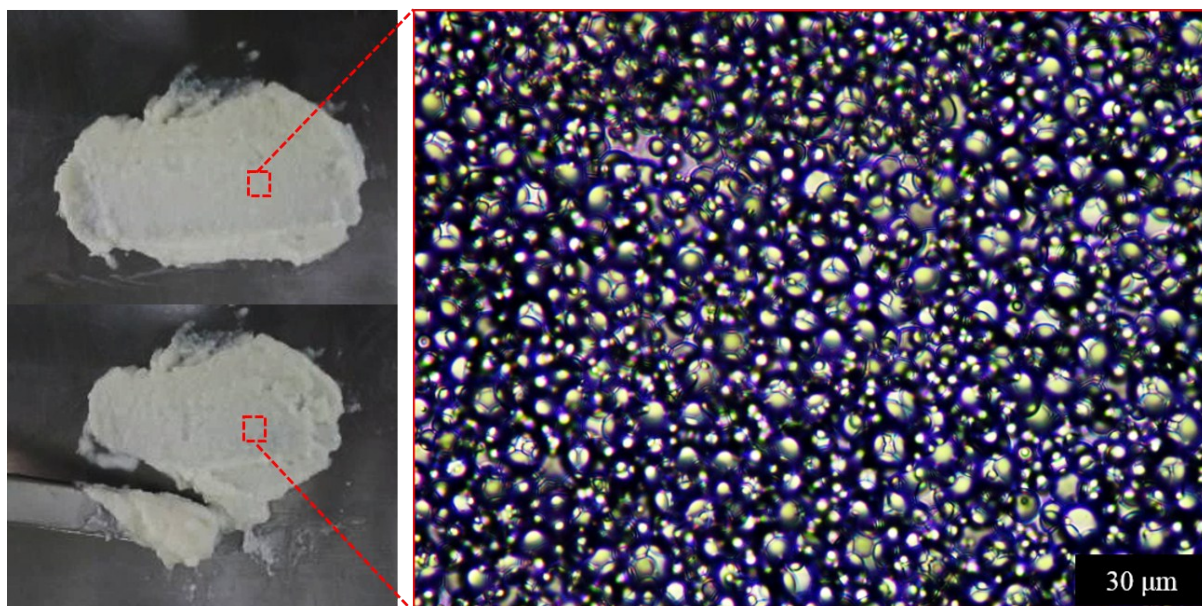

Fig. S4 Force-relative displacement curves (A) and yield force (hardness) values (B) for emulsion gels (60 wt% olive oil) stabilized by different GA fibril concentrations (1-4 wt%).

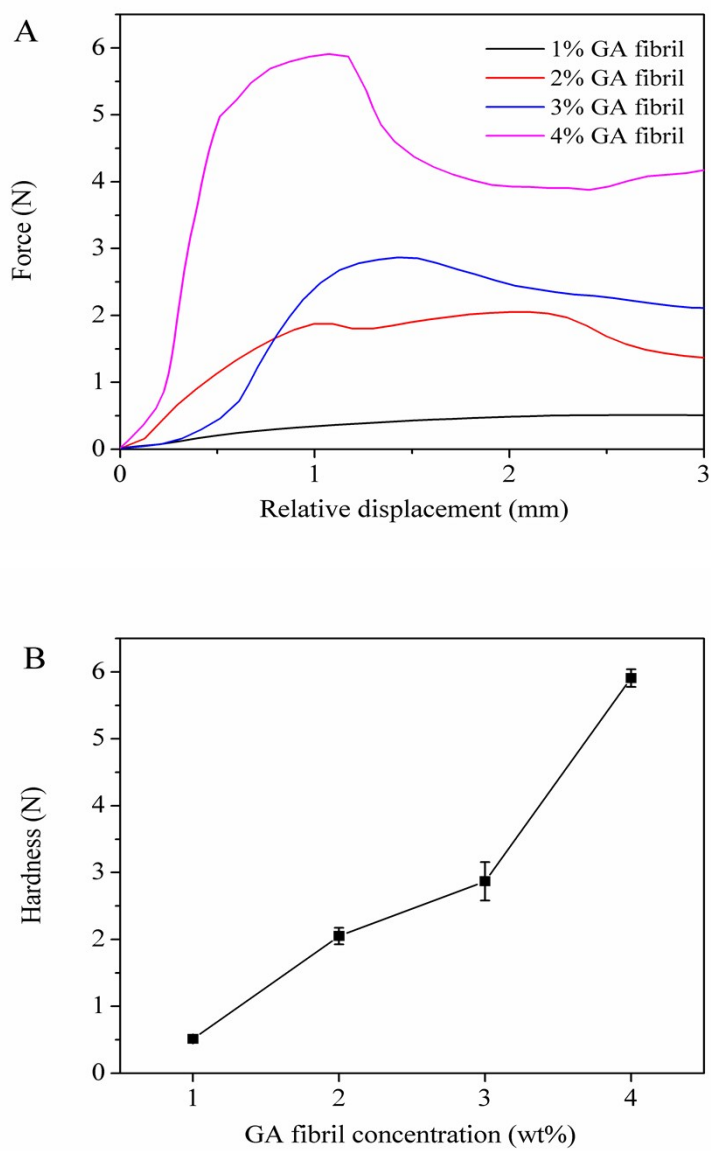

Fig. S5 Storage modulus ( $G'$ ) and loss modulus ( $G''$ ) of emulsion gels containing 60 wt% olive oil prepared using 1 (A) and 3 wt% (B) GA fibrils, measured during the heating (red line) and cooling (blue line) cycles. (Insets) Photographs of respective emulsion gels during heating and cooling.  $G'$  and  $G''$  are shown as filled and open symbols, respectively. (C) PLM images of the 4 wt% GA fibril-stabilized emulsion gel observed during heating and cooling processes.

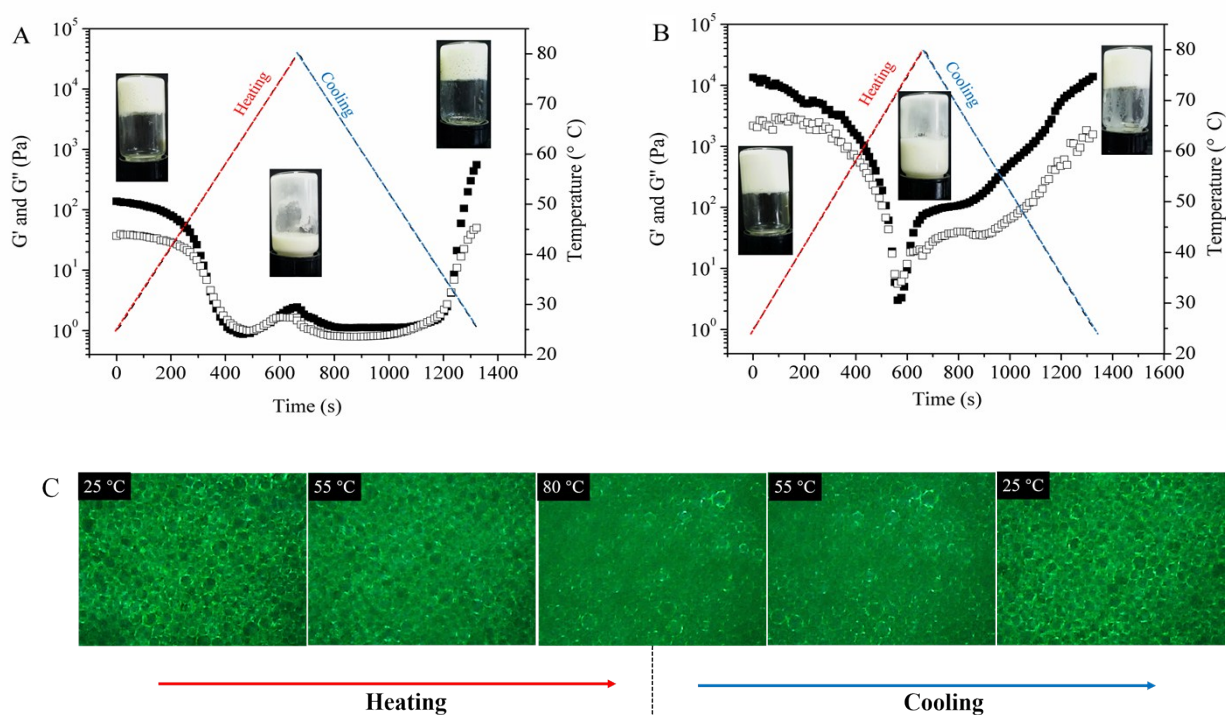

Fig. S6 (A) Storage modulus ( $G'$ ) and loss modulus ( $G''$ ) versus frequency for emulsion gels (60 wt% olive oil) prepared at different GA fibril concentrations (1-4 wt%) during 30 days of storage at room temperature (25 °C).  $G'$  and  $G''$  are shown as filled and open symbols, respectively. Photographs of these emulsion gels at initial (0 day) and after 30 days of storage at room temperature (25 °C). (B) The dried oil products containing nearly 94 wt% liquid oil obtained by freeze-drying of the 4 wt% GA fibril-stabilized emulsion gel. (C) Storage modulus ( $G'$ ) and loss modulus ( $G''$ ) as a function of frequency for the 4 wt% GA fibril-stabilized emulsion gel (60 wt% olive oil) with  $\beta$ -carotene (0.1 wt% of oil) during storage for 30 days. Photographs of emulsion gels (60 wt% olive oil) prepared at different GA fibril concentrations (1-4 wt%) with  $\beta$ -carotene (0.1 wt% of oil) at initial (0 day) and after 30 days of storage at room temperature (25 °C).

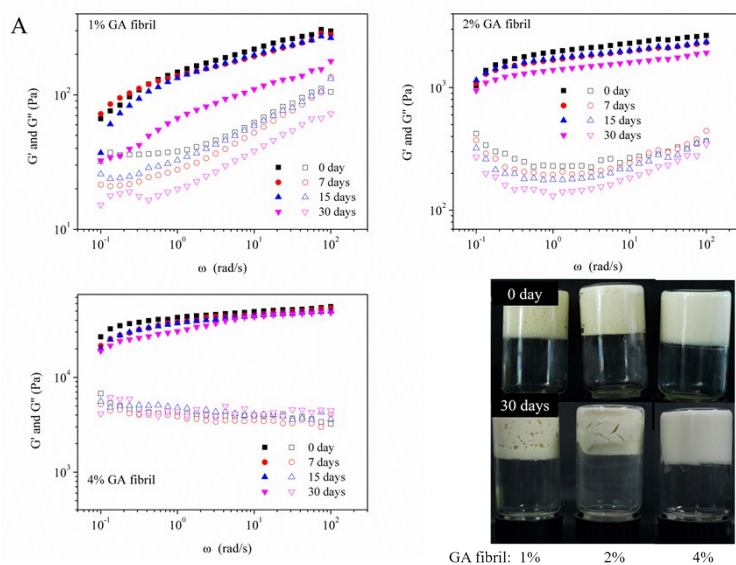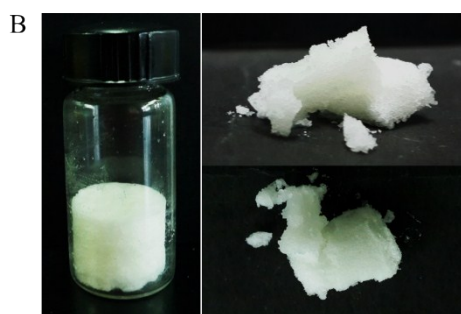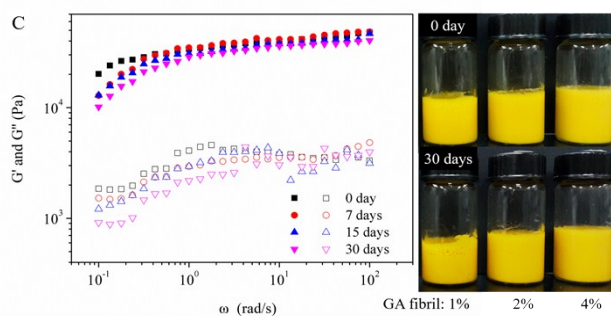

Supplement: c6fo01485b1.pdf [file c6fo01485b1.pdf]
